# Supplementary material for: The role of metal oxide interactions: revisiting Pt growth on the TiO2 surface in the process of impregnation method
Source: Royal Society of Chemistry journal article supplement (doi:10.1039/c7nr02913f), 2017-01-01
Supplement: c7nr02913f1.pdf [file c7nr02913f1.pdf]

## Supporting information

### Experimental Detail

Model TiO<sub>2</sub> support was synthesized by hydrothermal method. 60 ml TiCl<sub>4</sub> solutions (0.6 M, in the case of rutile TiO<sub>2</sub>, ) or TiSO<sub>4</sub>(0.6 M, in the case of anatase TiO<sub>2</sub>) was charged into a 100 mL Teflon-lined stainless steel autoclave in a heated furnace maintained at 220 °C for 12 hours. After the autoclave apparatus was cooled to room temperature in 2 hours, the product (suspension) was allowed to stand for 24 hours and was filtered after removing the supernatant, washed with water and alcohol several times till PH to 7 and no Cl<sup>-</sup> or SO<sub>4</sub><sup>2-</sup> could be detected. The white powder was then dried at 80 °C and calcined at 400 °C for 2 hours. The rutile and anatase TiO<sub>2</sub> is denoted as TiO<sub>2</sub>(A) and TiO<sub>2</sub>(R) respectively. 2 wt% Pt was deposited on the TiO<sub>2</sub> by wet impregnation method. In a typical process, 1g of TiO<sub>2</sub> powder was mixed with calculated amounts of chloroplatinic acid (H<sub>2</sub>PtCl<sub>6</sub>, Sinoreagent) in 120 ml water solution, followed by 30 mins ultrasonic dispersion, stirring to dry at 80 °C water bath. Then all catalysts were dried at 120 °C overnight, followed by calcined at 400 °C in air, which is denoted as PtO<sub>x</sub>/ (type of TiO<sub>2</sub>) for the samples after calcinations and before reduction. The PtO<sub>x</sub>/TiO<sub>2</sub> was then reduced in the flow of hydrogen(H<sub>2</sub>)/Argon(Ar) (10%) at 400 °C for 4 hours, denoted as Pt/ (type of TiO<sub>2</sub>), such as Pt/ TiO<sub>2</sub>(R).

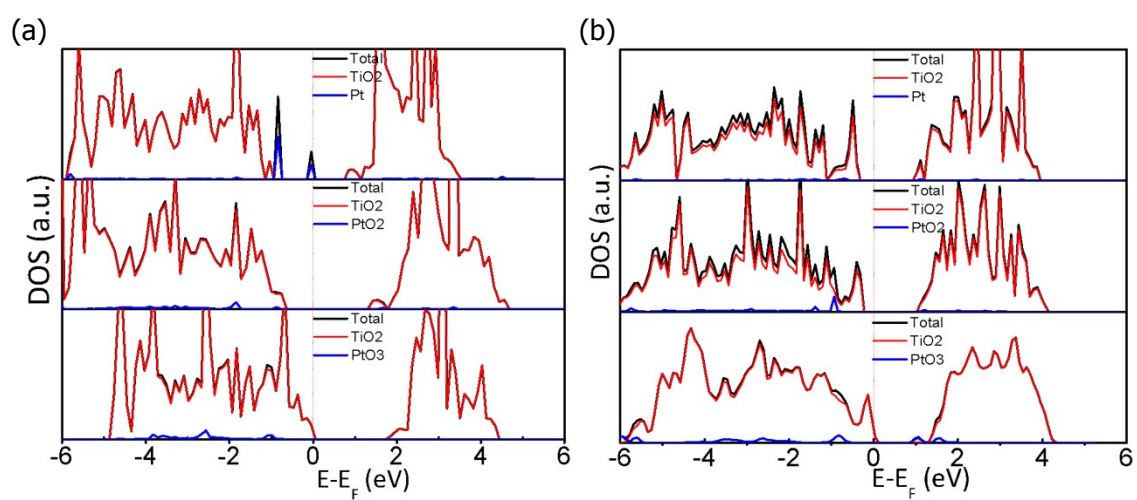

Figure S1 The partial density of state (pdos) of Pt,  $\text{PtO}_2$  and  $\text{PtO}_3$  cluster adsorption (from top to bottom) on the anatase (a) and rutile (b)  $\text{TiO}_2$  surface .

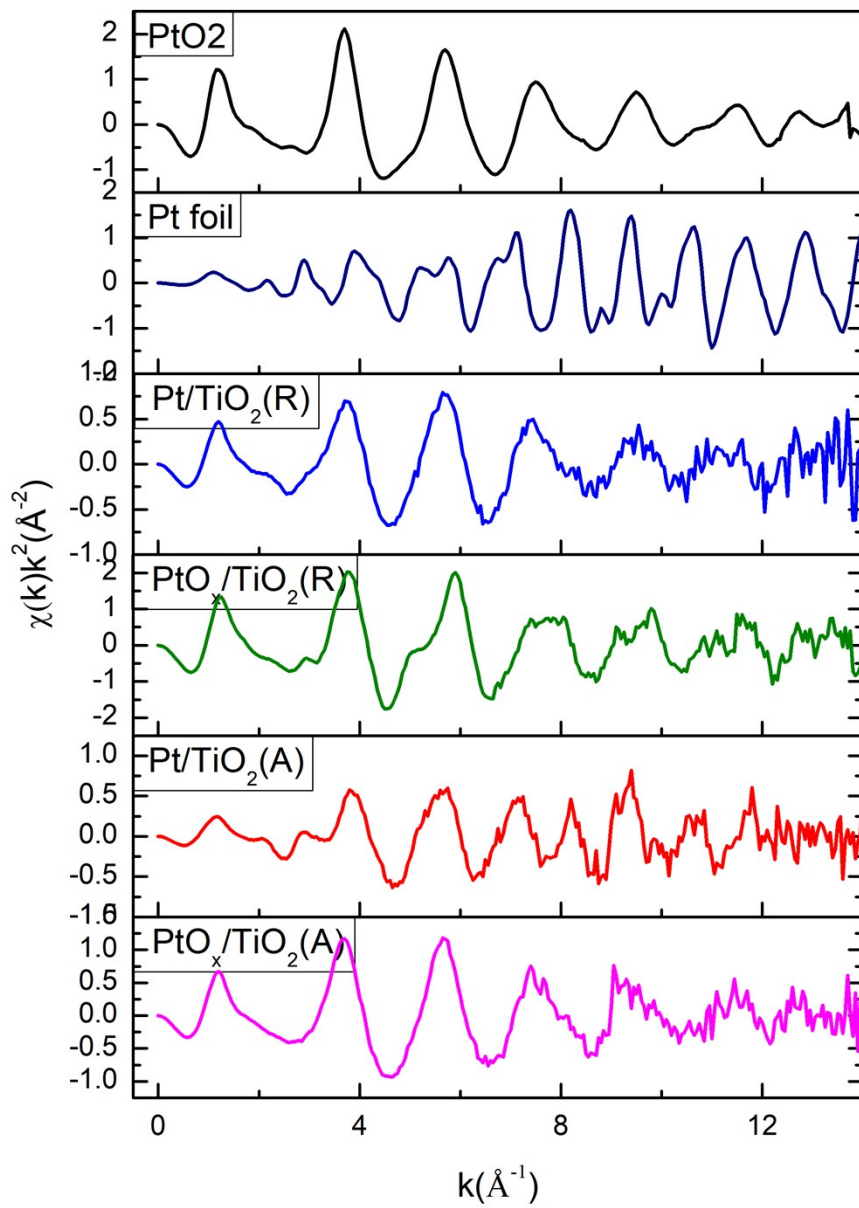

Figure S2 The  $\chi(k)$  oscillation of the EXAFS spectrum for Pt/TiO<sub>2</sub>

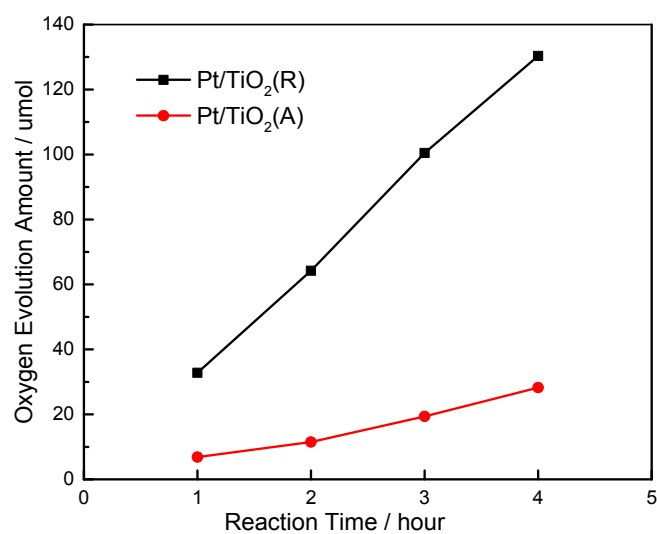

Figure S3 Photocatalytic oxygen evolution activity from water for 2wt% PtO<sub>x</sub>/TiO<sub>2</sub>(R) and Pt/TiO<sub>2</sub>(R). Photocatalytic oxygen evolution reactions were conducted in a Pyrex top-irradiation reactor cell of employing 50 mg of Pt/TiO<sub>2</sub> catalyst dispersed in the mixture of 100 ml 0.02 mol/L AgNO<sub>3</sub> solution at 25 °C for 30 min to equilibrate any adsorption processes in the dark. The reaction cell was then evacuated and irradiated under a 300 W Xe lamp. Evolved gases were analyzed by gas chromatography (GC-9200 equipped with TCD, and 6m x 2 mm x 250 μm MS-5A column).

**Table S1.** Pt 4f XPS fitted parameters

| Catalyst                               | Pt 4f <sub>7/2</sub> binding energy / eV <sup>a</sup> | Pt-O-Ti 4f <sub>7/2</sub> binding energy / eV | PtO 4f <sub>7/2</sub> binding energy / eV | PtO <sub>2</sub> 4f <sub>7/2</sub> binding energy / eV | FWHM <sup>b</sup> / eV | Surface Pt / atom% | Surface Pt-O-Ti / atom% | Surface PtO / atom% | Surface PtO <sub>2</sub> / atom% |
|----------------------------------------|-------------------------------------------------------|-----------------------------------------------|-------------------------------------------|--------------------------------------------------------|------------------------|--------------------|-------------------------|---------------------|----------------------------------|
| PtO <sub>x</sub> /TiO <sub>2</sub> (A) | 70.90                                                 | 72.10                                         | 73.30                                     | 74.72                                                  | 1.38                   | 30.04              | 52.07                   | 17.89               | 0                                |
| Pt/TiO <sub>2</sub> (A)                | 70.90                                                 | 72.10                                         | 73.30                                     | 74.72                                                  | 1.38                   | 73.2               | 24.54                   | 2.26                | 0                                |
| PtO <sub>x</sub> /TiO <sub>2</sub> (R) | 70.90                                                 | 72.10                                         | 73.30                                     | 74.72                                                  | 1.38                   | 0                  | 18.29                   | 0                   | 81.71                            |
| Pt/TiO <sub>2</sub> (R)                | 70.90                                                 | 72.10                                         | 73.30                                     | 74.72                                                  | 1.38                   | 8.98               | 20.71                   | 70.31               | 0                                |

<sup>a</sup> Peak position followed :4f 5/2=4f 7/2+3.35; Peak area followed :4f 5/2=0.75\*4f 7/2;

<sup>b</sup> Common FWHM adopted for all Pt components.
